# Supplementary material for: HMBA Enhances Prostratin-Induced Activation of Latent HIV-1 via Suppressing the Expression of Negative Feedback Regulator A20/TNFAIP3 in NF-κB Signaling
Source: Hindawi journal article supplement (doi:10.1155/2016/5173205), 2016-01-01
Supplement: f1 [file 5173205.f1.pdf]

Supplemental figure legends

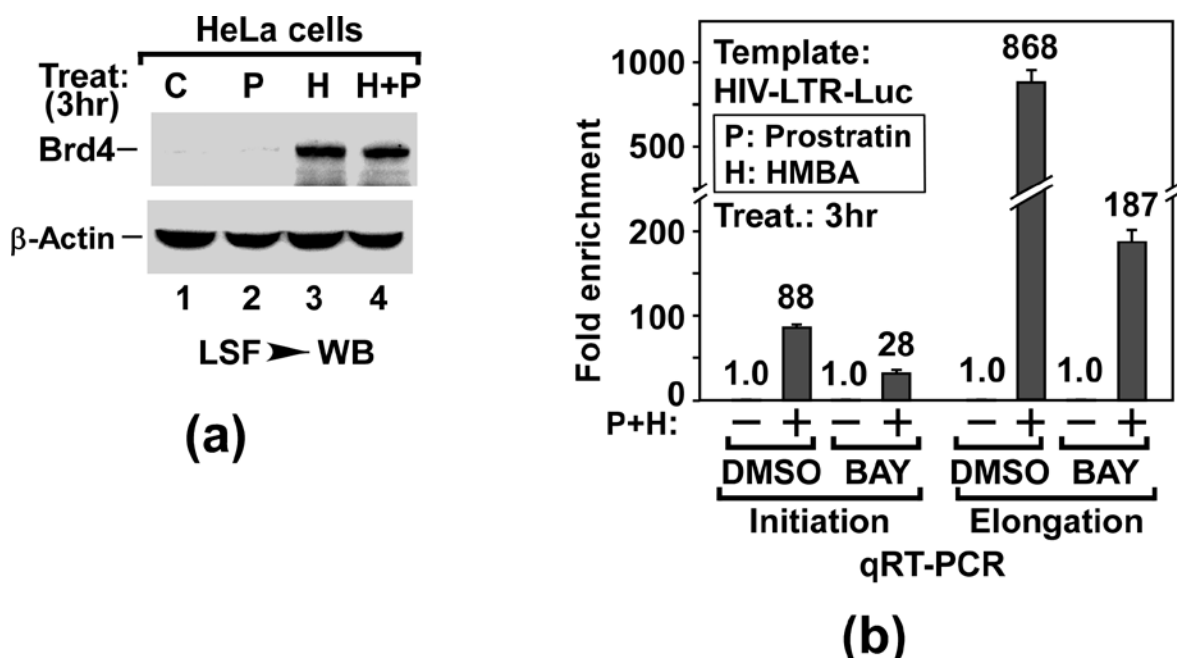

**FIGURE S1. Prostratin induces the transcriptional initiation via NF- $\kappa$ B signal pathway.** (a) Prostratin does not induce Brd4 activation. HeLa cells expressing f-RelA were treated as indicated, followed by low-salt fraction (LSF) preparation. The LSF was assayed by Western blot (WB) for the levels of free Brd4. (b) Inhibiting IKK by BAY blocks HMBA and prostratin co-treatment (H+P)-induced transcriptional initiation and elongation of HIV-LTR-Luc. HIV-LTR-Luc cells were pre-treated with BAY for 1 hr, followed by H+P treatment as indicated for 3 hr. The isolated RNA was assayed by qRT-PCR for the initiation and elongation transcripts of HIV-LTR-Luc as in Fig. 1E. BAY: IKK inhibitor BAY 11-7082.

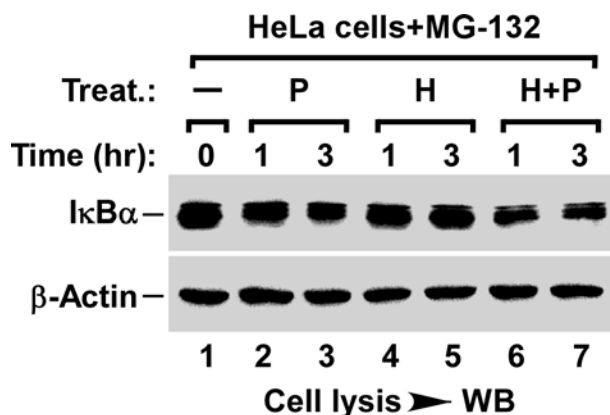

**FIGURE S2. MG-132 blocks HMBA and prostratin-induced  $\text{I}\kappa\text{B}\alpha$  degradation.** Levels of  $\text{I}\kappa\text{B}\alpha$  were analyzed by Western blot (WB) using the cell lysates prepared from HeLa cells with indicated pre-treatment and treatments. MG-132: proteasome inhibitor.
